# Supplementary material for: Study on the learning curve during the transition from direct lateral to direct anterior approach in total hip arthroplasty : a consecutive one hundred and twenty-seven case series
Source: Research Square preprint supplement (doi:10.21203/rs.3.rs-1751513/v1), 2022-06-27
Supplement: Supplementary file 1 [file 8e6bf7e57fef1b14a5f21485.xlsx]

## Sheet: Sheet1
Group	case	gender	ORT(m)	Age(year)	Blood Loss(ml)	Blood Transfusion(u)	Length Of Stay（days）	BMI	OPT(m)	PT（m）	Blood Transfusion(ml)	height(cm)	weight(Kg)
DLA	1	Male	170	70	300	2	9	24.5351	20	150	400	176	76
DLA	2	Male	130	65	300	1.5	21	24.3911	29	101	300	173	73
DLA	3	Male	120	72	200	3	15	24.6755	22	98	600	172	73
DLA	4	Male	140	77	400	3	16	22.8571	25	115	600	175	70
DLA	5	Male	105	80	200	0	6	22.4088	27	78	0	178	71
DLA	6	Male	100	74	200	14.5	62	22.4913	26	74	2900	170	65
DLA	7	Male	180	58	600	2	9	26.8923	25	155	400	167	75
DLA	8	Female	140	75	300	0	9	24.0346	32	108	0	158	60
DLA	9	Female	180	73	600	2	17	21.4844	26	154	400	160	55
DLA	10	Female	120	63	200	1.5	14	23.4221	31	89	300	156	57
DLA	11	Female	100	77	200	0	8	19.2234	28	72	0	153	45
DLA	12	Female	160	73	300	1.5	11	19.563	21	139	300	155	47
DLA	13	Female	120	74	400	0	14	19.4734	26	94	0	157	48
DLA	14	Female	110	78	400	4	9	22.3757	25	85	800	161	58
DLA	15	Female	120	62	300	1.5	9	19.6283	30	90	300	158	49
DLA	16	Female	140	73	200	1.5	12	18.75	24	116	300	160	48
DLA	17	Female	110	53	100	0	8	20.7008	27	83	0	163	55
DLA	18	Female	110	74	100	0	10	23.6128	31	79	0	154	56
DLA	19	Female	110	79	200	3	12	20.6905	23	87	600	157	51
DLA	20	Female	120	75	150	0	7	21.7784	22	98	0	156	53
DLA	21	Female	180	78	500	7.5	10	21.6441	24	156	1500	155	52
DLA	22	Female	170	75	200	0	14	19.7777	22	148	0	159	50
DLA	23	Female	170	75	300	2	13	18.8271	23	147	400	158	47
DLA	24	Female	120	63	200	1.5	14	22.1893	25	95	300	156	54
DLA	25	Female	110	59	200	3	15	21.1927	30	80	600	164	57
DLA	26	Female	150	79	200	9.5	14	23.4375	28	122	1900	160	60
DLA	27	Female	130	58	150	2	11	18.3594	30	100	400	160	47
DAA1-50	28	Male	230	65	350	1.5	19	23.6652	50	180	300	167	66
DAA1-50	29	Female	200	60	700	2	15	22.6562	44	156	400	160	58
DAA1-50	30	Female	190	68	300	1.5	10	22.4813	40	150	300	162	59
DAA1-50	31	Female	180	73	200	2	14	20.4294	37	143	400	158	51
DAA1-50	32	Male	220	61	300	3.5	6	23.04	38	182	700	178	73
DAA1-50	33	Female	230	76	400	3	8	18.9866	45	185	600	159	48
DAA1-50	34	Female	170	74	300	2	10	19.9792	35	135	400	155	48
DAA1-50	35	Female	210	81	800	6.5	8	19.1467	38	172	1300	155	46
DAA1-50	36	Female	220	63	600	4	15	18.8271	48	172	800	158	47
DAA1-50	37	Female	130	69	100	0	7	21.2183	35	95	0	161	55
DAA1-50	38	Female	180	72	200	0	11	20.1733	41	139	0	159	51
DAA1-50	39	Female	170	66	100	4	10	24.0346	38	132	800	158	60
DAA1-50	40	Male	160	63	200	2	8	22.3863	38	122	400	173	67
DAA1-50	41	Female	130	81	250	2	12	20.7008	35	95	400	163	55
DAA1-50	42	Male	165	70	200	2	12	22.7903	32	133	400	174	69
DAA1-50	43	Female	170	66	100	1.5	16	18.5178	38	132	300	161	48
DAA1-50	44	Female	160	73	300	3	9	23.0518	44	116	600	164	62
DAA1-50	45	Female	160	68	200	3	15	22.4323	34	126	600	158	56
DAA1-50	46	Female	180	71	200	4	14	21.0962	44	136	800	157	52
DAA1-50	47	Female	160	64	200	2	9	20.8117	33	127	400	155	50
DAA1-50	48	Male	130	77	300	4	13	24.5089	26	104	800	169	70
DAA1-50	49	Female	170	85	300	2	14	19.9792	30	140	400	155	48
DAA1-50	50	Male	115	69	350	4	8	23.03	28	87	800	168	65
DAA1-50	51	Female	140	80	300	0	10	19.8178	34	106	0	154	47
DAA1-50	52	Female	195	68	200	2	7	20.4294	37	158	400	158	51
DAA1-50	53	Female	180	72	200	0	9	21.2306	36	144	0	158	53
DAA1-50	54	Male	150	74	100	2	13	22.3094	30	120	400	172	66
DAA1-50	55	Female	140	75	400	3.5	9	22.2656	33	107	700	160	57
DAA1-50	56	Female	160	85	300	3	10	22.5466	38	122	600	159	57
DAA1-50	57	Male	160	77	400	3.5	13	23.255	37	123	700	171	68
DAA1-50	58	Female	150	75	300	3	8	23.8281	42	108	600	160	61
DAA1-50	59	Female	180	76	300	3.5	13	25.0762	40	140	700	161	65
DAA1-50	60	Female	110	74	400	0	9	19.9792	30	80	0	155	48
DAA1-50	61	Female	100	71	300	3.5	8	19.8178	27	73	700	154	47
DAA1-50	62	Female	160	75	100	1.5	6	20.5688	33	127	300	159	52
DAA1-50	63	Female	150	69	300	3	16	21.2306	32	118	600	158	53
DAA1-50	64	Female	145	87	800	8	9	18.75	36	109	1600	160	48
DAA1-50	65	Female	160	74	300	4	9	20.2848	37	123	800	157	50
DAA1-50	66	Male	120	69	300	2	12	24.2587	34	86	400	177	76
DAA1-50	67	Female	150	75	300	4	13	22.1003	35	115	800	162	58
DAA1-50	68	Female	150	52	300	2	12	20.8209	36	114	400	164	56
DAA1-50	69	Female	170	75	300	2	8	20.5457	31	139	400	156	50
DAA1-50	70	Female	120	75	200	0	8	20.3954	30	90	0	155	49
DAA1-50	71	Female	90	77	200	2	12	21.5019	20	70	400	157	53
DAA1-50	72	Female	180	71	400	2	13	18.591	39	141	400	159	47
DAA1-50	73	Female	160	88	200	2	9	20.0288	29	131	400	158	50
DAA1-50	74	Female	110	62	200	0	14	19.313	33	77	0	156	47
DAA1-50	75	Male	130	90	100	4	12	23.5102	35	95	800	175	72
DAA1-50	76	Female	170	62	300	2	7	20.1951	35	135	400	162	53
DAA1-50	77	Female	130	63	100	0	12	20.3125	27	103	0	160	52
DAA51-100	78	Female	135	62	150	2	10	26.0375	27.5	107.5	400	158	65
DAA51-100	79	Female	140	80	150	2	13	24.4646	23	117	400	163	65
DAA51-100	80	Female	90	89	300	2	12	22.3081	18	72	400	164	60
DAA51-100	81	Female	140	70	300	2	9	22.0317	43	97	400	158	55
DAA51-100	82	Female	140	69	200	0	10	21.0962	30	110	0	157	52
DAA51-100	83	Female	140	72	200	6	7	19.9792	35	105	1200	155	48
DAA51-100	84	Female	170	58	50	2	14	21.3599	43	127	400	159	54
DAA51-100	85	Female	195	52	400	3	18	22.2656	39	156	600	160	57
DAA51-100	86	Female	140	56	200	0	12	19.6283	28	112	0	158	49
DAA51-100	87	Female	165	70	400	2	13	20.9644	27	138	400	159	53
DAA51-100	88	Female	90	68	100	2	13	20.3125	20	70	400	160	52
DAA51-100	89	Female	160	67	300	3	10	19.8178	27	133	600	154	47
DAA51-100	90	Male	180	88	400	4	12	22.8374	32	148	800	170	66
DAA51-100	91	Female	170	68	350	4	10	19.9792	30	140	800	155	48
DAA51-100	92	Male	130	65	150	1.5	7	21.3839	25	105	300	173	64
DAA51-100	93	Female	140	83	200	2	9	20.5457	24	116	400	156	50
DAA51-100	94	Female	120	69	200	2	14	19.8141	27	93	400	162	52
DAA51-100	95	Female	160	78	250	2	9	19.4734	35	125	400	157	48
DAA51-100	96	Female	130	75	200	2	10	23.1405	26	104	400	165	63
DAA51-100	97	Female	110	77	100	2	12	22.8329	25	85	400	158	57
DAA51-100	98	Female	110	88	200	2	14	27.6398	23	87	400	158	69
DAA51-100	99	Male	120	65	200	0	6	23.255	25	95	0	171	68
DAA51-100	100	Female	125	77	200	2	7	22.6003	33	92	400	156	55
DAA51-100	101	Male	150	73	200	3	10	24.8016	33	117	600	168	70
DAA51-100	102	Female	170	53	300	4	8	19.1467	43	127	800	155	46
DAA51-100	103	Female	150	71	200	3	25	21.3593	39	111	600	153	50
DAA51-100	104	Male	120	73	300	2	11	23.8087	27	93	400	169	68
DAA51-100	105	Female	140	77	200	3	14	20.3125	30	110	600	160	52
DAA51-100	106	Female	140	77	150	3	9	21.2183	22	118	600	161	55
DAA51-100	107	Female	150	73	150	2	11	19.2277	24	126	400	158	48
DAA51-100	108	Female	140	58	200	1.5	5	24.3418	24	116	300	157	60
DAA51-100	109	Female	90	69	150	2	8	22.5466	21	69	400	159	57
DAA51-100	110	Male	140	62	200	2	11	26.1224	29	111	400	175	80
DAA51-100	111	Male	150	53	150	2	7	23.8367	35	115	400	175	73
DAA51-100	112	Female	110	73	200	2	13	21.83	24	86	400	163	58
DAA51-100	113	Female	140	76	300	3	9	23.7954	21	119	600	164	64
DAA51-100	114	Female	110	84	100	2	7	24.4646	23	87	400	163	65
DAA51-100	115	Male	160	63	200	2	6	22.7204	27	133	400	173	68
DAA51-100	116	Male	140	75	150	2	12	23.2438	28	112	400	176	72
DAA51-100	117	Male	150	71	200	2	9	21.7776	29	121	400	178	69
DAA51-100	118	Female	120	77	200	2	8	22.2656	40	80	400	160	57
DAA51-100	119	Female	140	75	200	2	9	23.9361	24	116	400	157	59
DAA51-100	120	Female	160	79	100	2	9	19.6283	30	130	400	158	49
DAA51-100	121	Male	90	71	100	3	12	23.6614	18	72	600	172	70
DAA51-100	122	Female	100	50	100	2	8	20.5457	21	79	400	156	50
DAA51-100	123	Female	120	90	150	3	6	20.2848	29	91	600	157	50
DAA51-100	124	Male	150	85	200	3	11	23.9395	36	114	600	177	75
DAA51-100	125	Female	140	83	300	3	9	20.9644	27	113	600	159	53
DAA51-100	126	Female	100	85	200	3	8	19.5312	22	78	600	160	50
DAA51-100	127	Female	120	68	200	3	7	19.6752	26	94	600	161	51
